# Supplementary material for: Overexpression of OsFTL10 induces early flowering and improves drought tolerance in Oryza sativa L
Source: PeerJ. 2019 Feb 12;7:e6422. doi: 10.7717/peerj.6422 (PMC6376957; doi:10.7717/peerj.6422)
Supplement: Supplemental Information 3 — RNAs were extracted from different explants for qRT-PCR,each data was from three replicates. [file peerj-07-6422-s004.xlsx]

## Sheet: ox2 & ox8
Regulation of flowering gene expression in ox2 and ox8
	Sample Name	Target Name	RQ	RQ Min	RQ Max	RQ SD	Cт Mean	Cт SD	Automatic
	WT	MADS15	1	0.889179	1.12463	0.110821	25.9271	0.128675	TRUE
	2#	MADS15	4.24246	3.45749	5.20565	0.784974	23.4525	0.3292	TRUE
	8#	MADS15	5.85631	5.01107	6.84412	0.845237	23.2421	0.231951	TRUE
	WT	OsGI	1	0.80918	1.23582	0.213715	21.682	0.215096	TRUE
	2#	OsGI	1.12762	1.03235	1.23168	0.099694	21.2061	0.0132526	TRUE
	8#	OsGI	0.816167	0.719124	0.926304	0.103659	21.7747	0.127672	TRUE
	WT	Hd1	1	0.844031	1.18479	0.170583	29.4525	0.161271	TRUE
	2#	Hd1	1.14982	1.0147	1.30293	0.144211	28.9484	0.0929513	TRUE
	8#	Hd1	0.769765	0.715632	0.827993	0.0561933	29.6296	0.0232161	TRUE
	WT	MADS51	1	0.873001	1.14547	0.136341	24.846	0.11412	TRUE
	2#	MADS51	0.25717	0.232477	0.284485	0.026015	26.5025	0.0525944	TRUE
	8#	MADS51	0.0814084	0.0728973	0.0909131	0.00901246	28.2643	0.104761	TRUE
	WT	Ehd1	1	0.665059	1.50363	0.422101	29.1876	0.446532	TRUE
	2#	Ehd1	2.02577	1.81449	2.26165	0.223691	27.8665	0.0697397	TRUE
	8#	Ehd1	1.7299	1.57478	1.9003	0.162822	28.1966	0.0793257	TRUE
	WT	FT1	1	0.857844	1.16571	0.154085	28.7974	0.139299	TRUE
	2#	FT1	2.6687	2.43748	2.92186	0.242271	27.0786	0.0251299	TRUE
	8#	FT1	2.1551	1.92755	2.40952	0.24111	27.4893	0.106461	TRUE
	WT	Hd3a	1	0.84299	1.18625	0.17184	29.6407	0.162904	TRUE
	2#	Hd3a	1.9108	1.69467	2.15449	0.230049	28.4038	0.0855682	TRUE
	8#	Hd3a	1.50229	1.35046	1.67119	0.160442	28.8532	0.0990169	TRUE
	WT	RFT1	1	0.908683	1.10049	0.0959416	26.8858	0.0365392	TRUE
	2#	RFT1	0.710545	0.648761	0.778213	0.0647482	27.0762	0.0264259	TRUE
	8#	RFT1	0.667775	0.617269	0.722414	0.0525858	27.2681	0.0511846	TRUE
	WT	MADS14	1	0.957336	1.04457	0.0426642	26.4521	0.0940114	TRUE
	2#	MADS14	1.17799	1.11246	1.24737	0.0655254	26.0974	0.059591	TRUE
	8#	MADS14	1.29788	1.1529	1.46109	0.144981	25.9307	0.17487	TRUE

## Sheet: i2 & i5
Regulation of flowering gene expression in ox2 and ox8
Sample Name	Target Name	RQ	RQ Min	RQ Max	RQ SD	Cт Mean	Cт SD	Automatic Ct Threshold
WT	OsGI	1	0.992105	1.00796	0.00789522	21.7652	0.166926	TRUE
2i	OsGI	0.948082	0.860543	1.04453	0.0875385	21.7086	0.129572	TRUE
5i	OsGI	0.966233	0.71598	1.30396	0.250253	21.5675	0.270749	TRUE
WT	Hd1	1	0.89018	1.12337	0.10982	29.4789	0.0869854	TRUE
2i	Hd1	1.10865	0.851074	1.44418	0.257575	29.1966	0.350515	TRUE
5i	Hd1	1.0444	0.912114	1.19587	0.132283	29.169	0.300194	TRUE
WT	MADS51	1	0.883382	1.13201	0.116618	24.8823	0.0306799	TRUE
2i	MADS51	1.05176	0.883535	1.25201	0.168225	24.676	0.240993	TRUE
5i	MADS51	1.14188	0.977588	1.33379	0.164294	24.4436	0.307333	TRUE
WT	Ehd1	1	0.847824	1.17949	0.152176	29.3472	0.365538	TRUE
2i	Ehd1	0.957563	0.701989	1.30618	0.255574	29.2762	0.433482	TRUE
5i	Ehd1	0.949168	0.87722	1.02702	0.071948	29.1751	0.19916	TRUE
WT	RFT1	1	0.907347	1.10211	0.0926531	26.8837	0.0303416	TRUE
2i	RFT1	1.10741	0.814301	1.50603	0.293112	26.603	0.403405	TRUE
5i	RFT1	1.05365	0.959864	1.1566	0.0937843	26.561	0.257565	TRUE
WT	Hd3a	1	0.961703	1.03982	0.0382972	29.6342	0.225081	TRUE
2i	Hd3a	1.09779	0.923763	1.3046	0.174024	29.366	0.295095	TRUE
5i	Hd3a	0.9015	0.82919	0.980116	0.0723098	29.5365	0.250045	TRUE
WT	MADS14	1	0.993534	1.00651	0.00646601	26.347	0.176145	TRUE
2i	MADS14	0.971421	0.802023	1.1766	0.169398	26.2553	0.236897	TRUE
5i	MADS14	0.960417	0.825175	1.11783	0.135243	26.158	0.214608	TRUE
WT	FT1	1	0.957747	1.04412	0.0422534	28.8424	0.085862	TRUE
2i	FT1	0.74405	0.668304	0.828382	0.113192	29.1707	0.218907	TRUE
5i	FT1	0.680183	0.555566	0.905355	0.247338	29.1703	0.206874	TRUE
WT	MADS15	1	0.903045	1.10736	0.144475	25.9836	0.0714868	TRUE
2i	MADS15	0.94759	0.855961	1.04903	0.136518	25.963	0.101483	TRUE
5i	MADS15	0.903097	0.896495	0.909748	0.00937179	25.9026	0.162713	TRUE
