# Supplementary material for: Overexpression of OsFTL10 induces early flowering and improves drought tolerance in Oryza sativa L
Source: PeerJ. 2019 Feb 12;7:e6422. doi: 10.7717/peerj.6422 (PMC6376957; doi:10.7717/peerj.6422)
Supplement: Supplemental Information 5 — 50 seedlings were used for each treatment and data collected from 3 replicates. [file peerj-07-6422-s006.xlsx]

## Sheet: Sheet1
Survival rates of transgenic plants after drought stress
	Survival rate after 25 days(%)
Transgenic lines	WT	ox2	ox5	ox8
	0.06	0.92	0.96	0.98
	0.04	0.78	0.82	0.92
	0.08	0.82	0.86	0.82
Average	0.06	0.84	0.88	0.906667
SD	0.02	0.072111	0.072111	0.080829
		Survival rates after 20 days(%)
Transgenic lines	WT	i1	i2	i5
	0.96	0.1	0.06	0.1
	0.94	0.18	0.04	0.06
	0.86	0.14	0.08	0.1
Average	0.92	0.14	0.06	0.0866667
SD	0.052915	0.04	0.02	0.023094

## Sheet: details
Dought tolerance of OsFTL10 overexpression lines(25 days after drought treatment)
		No.of seedlings for treatment	No.of seedlings survived	Survival rate (%)
Rep1	WT	50	3	0.06
	ox2	50	46	0.92
	ox5	50	48	0.96
	ox8	50	49	0.98
Rep2	WT	50	2	0.04
	ox2	50	39	0.78
	ox5	50	41	0.82
	ox8	50	46	0.92
Rep2	WT	50	4	0.08
	ox2	50	41	0.82
	ox5	50	43	0.86
	ox8	50	41	0.82
	WT	ox2	ox5	ox8
	0.06	0.92	0.96	0.98
	0.04	0.78	0.82	0.92
	0.08	0.82	0.86	0.82
Average	0.06	0.84	0.88	0.906667
SD	0.02	0.072111	0.072111	0.080829
Dought tolerance of OsFTL10 overexpression lines(20 days after drought treatment)
		No.of seedlings for treatment	No.of seedlings survived	Survival rate (%)
Rep1	WT	50	48	0.96
	i1	50	5	0.1
	i2	50	3	0.06
	i5	50	5	0.1
Rep2	WT	50	47	0.94
	i1	50	9	0.18
	i2	50	2	0.04
	i5	50	3	0.06
Rep2	WT	50	43	0.86
	i1	50	7	0.14
	i2	50	4	0.08
	i5	50	5	0.1
	WT	i1	i2	i5
	0.96	0.1	0.06	0.1
	0.94	0.18	0.04	0.06
	0.86	0.14	0.08	0.1
Average	0.92	0.14	0.06	0.0866667
SD	0.052915	0.04	0.02	0.023094
