# Supplementary material for: Overexpression of OsFTL10 induces early flowering and improves drought tolerance in Oryza sativa L
Source: PeerJ. 2019 Feb 12;7:e6422. doi: 10.7717/peerj.6422 (PMC6376957; doi:10.7717/peerj.6422)
Supplement: Supplemental Information 6 — Data of plant height, number of grains per main panicle and heading date were collected from 15 to 20 plants. Grain weight was calculate from weighing 100 grains. [file peerj-07-6422-s007.xlsx]

## Sheet: summerized data
Yield traits in transgenic plants
Grain number/panicle
	WT	ox2	ox5	ox8	i1	i2	i5
Average	128	71.1667	75.4583	54.2917	125.083	127.5	129.25
SD	4.05398	3.2123	4.76381	4.26797	5.62538	4.09666	4.45509
Plant height (cm)
	WT	ox2	ox5	ox8	i1	i2	i5
Average	83.8667	64.6	66.5333	61.1333	86.4	84.0667	83.4667
SD	2.19957	2.44365	2.29492	2.35635	2.41424	3.89994	2.50333
Heading date(days)
	WT	ox2	ox5	ox8	i1	i2	i5
Average	67.5333	52.1333	55.2667	48	70.2667	69.1333	68.0667
SD	2.32584	1.55226	1.43759	1.19523	1.43759	1.12546	1.09978
Grain weight(mg)
	WT	ox2	ox5	ox8	i1	i2	i5
Average	22.4	17.1	18	18.1	23.1	22.6	22.7
SD	0.36	0.15	0.2	0.21	0.2	0.15	0.25

## Sheet: details
Grain number per main panicle									Plant height (cm)
	WT	ox2	ox5	ox8	i1	i2	i5		WT	ox2	ox5	ox8	i1	i2	i5
	124	78	75	58	125	122	135		81	63	71	59	89	79	83
	127	66	79	60	120	134	127		85	61	69	57	85	81	79
	135	74	69	59	127	124	132		80	66	65	63	83	82	86
	127	73	73	51	118	128	125		87	64	66	65	85	81	88
	126	75	71	49	115	131	122		83	67	69	60	86	78	85
	123	70	76	55	130	132	134		84	69	67	59	88	86	86
	125	69	77	53	125	127	128		84	65	68	61	87	83	84
	125	67	79	62	114	126	130		82	63	64	62	91	88	81
	131	73	72	57	128	129	132		85	62	66	64	84	85	83
	134	70	68	49	124	123	127		86	64	67	63	86	84	85
	131	74	81	52	127	132	126		83	69	63	62	83	87	82
	127	75	83	55	118	121	138		83	62	65	58	90	80	85
	123	66	79	57	125	133	135		85	65	69	62	88	89	84
	127	68	73	58	132	125	129		88	66	64	59	85	91	81
	126	71	68	61	126	132	136		82	63	65	63	86	87	80
	121	69	75	52	125	127	132
	133	73	70	48	133	124	129	SUM	1258	969	998	917	1296	1261	1252
	126	75	84	56	126	134	128	Average	83.8667	64.6	66.5333	61.1333	86.4	84.0667	83.4667
	129	72	82	58	123	128	127	SD	2.19957	2.44365	2.29492	2.35635	2.41424	3.89994	2.50333
	127	67	78	53	120	122	123
	133	71	80	51	137	123	122
	125	70	74	48	129	131	130
	132	69	71	50	124	125	131
	135	73	74	51	131	127	124
Sum	3072	1708	1811	1303	3002	3060	3102
Average	128	71.1667	75.4583	54.2917	125.083	127.5	129.25
SD	4.05398	3.2123	4.76381	4.26797	5.62538	4.09666	4.45509
Heading date (days)										Grain weight per 100 grains (mg)
	WT	ox2	ox5	ox8	i1	i2	i5			WT	ox2	ox5	ox8	i1	i2	i5
	64	49	53	46	68	67	66		rep1	2230	1710	1780	1830	2330	2260	2290
	64	50	53	46	68	68	67		rep2	2210	1700	1820	1790	2290	2280	2270
	65	51	54	47	69	68	67		rep3	2280	1730	1800	1800	2310	2250	2240
	65	51	54	47	69	68	67
	65	52	55	48	70	69	68		Average	2240	1713.33	1800	1806.67	2310	2263.33	2266.67
	68	52	55	48	70	69	68		SD	36.0555	15.2753	20	20.8167	20	15.2753	25.1661
	68	52	55	48	70	69	68
	68	52	55	48	70	69	68
	68	52	55	48	70	69	68
	69	52	56	48	71	69	68
	69	53	56	48	71	70	68
	69	53	56	49	71	70	69
	70	54	57	49	72	70	69
	70	54	57	50	72	71	70
	71	55	58	50	73	71	70
SUM	1013	782	829	720	1054	1037	1021
Average	67.5333	52.1333	55.2667	48	70.2667	69.1333	68.0667
	2.32584	1.55226	1.43759	1.19523	1.43759	1.12546	1.09978
