# Supplementary material for: Overexpression of OsFTL10 induces early flowering and improves drought tolerance in Oryza sativa L
Source: PeerJ. 2019 Feb 12;7:e6422. doi: 10.7717/peerj.6422 (PMC6376957; doi:10.7717/peerj.6422)
Supplement: Supplemental Information 7 — Heading date (days) was scored from seed germination to heading. [file peerj-07-6422-s008.xlsx]

## Sheet: Sheet1
Heading date of CaMV35S::Hd3a transgenic plants (days from germination to heading)
	Transgenic line		ox1	ox2	ox3
			24	24	20
			25	24	21
			25	24	22
			25	25	22
			25	25	22
			25	25	23
			26	25	23
			26	26	23
			26	26	23
			27	26	24
			27	26	24
			27	26	24
			27	26	24
			27	27	25
			28	27	25
			28	27	25
			29	28	26
			29	28	26
				29	26
	Average heading date		26.4444	26	23.5789
