# Supplementary material for: Overexpression of OsFTL10 induces early flowering and improves drought tolerance in Oryza sativa L
Source: PeerJ. 2019 Feb 12;7:e6422. doi: 10.7717/peerj.6422 (PMC6376957; doi:10.7717/peerj.6422)
Supplement: Table S1 [file peerj-07-6422-s001.xlsx]

## Sheet: Sheet1
Supplementary Table 1. Primers for CDS cloning, FTL10 promoter,and qRT-PCR
GF14a-FW-BamHI	AATTGGATCCATGGCGGCGGCGGCGGGAGGAGGGACGA
GF14a-RE-EcoRI	AATTGAATTCGTGCTCATCCTCAGGCTTGGTTGCATCCC
GF14b-FW-BamH1	AAGGATCCATGTCGGCACAGGCGGAGCTTTCCCGT
GF14b-FW-BamHI	AAGGATCCTTACTGCCCCTCGCTGGAGTCGCGCT
GF14c-FW-BamH1	AAGGATCCATGTCTCGGGAGGAGAATGTCTAC
GF14c-RE-EcoR1	AAGAATTCTTACTGGCCCTCGCAGGCGTCGC
GF14d-FW-BamHI	AATTGGATCCATGTCGCCGGCGGAGCCGACGAGGGAGGA
GF14d-RE-EcoRI	AATTGAATTCCTGATCCCCAGGCTCTTTTGGAGCTG
GF14e-FW-BamHI	AATTGGATCCATGTCGCAGCCTGCTGAGCTTTCCCGTGAGG
GF14e-RE-EcoRI	AATTGAATTCCTGTCCATCTCCTGATTCGCCCTTGG
GF14f-FW-BamHI	AATTGGATCCATGTCGCCTGCTGAGGCATCGCGTGAGGAGA
GF14f-Re-BamHI	AATTGGATCCGTGGCCCTCTCCTTCAGGCTTCGCTG
GF14g-FW-EcoRI	AATTGAATTCATGGCCCCCAGCGACGACCTCGTCTACA
GF14g-RE-EcoRI	AATTGAATTCGGTATAGATCAGAGCAGGCAAGGAATGAG
GF14h-FW-BamHI	AATTGGATCCATGAAGGAGAGGGAGAAGGTGGTGC
GF14h-RE-EcoRI	AATTGAATTCGCCCTCCATAACAACATCATCGTCCTT
Fw-OsFTL10-EcoRI	AAAGAATTCATGGATCCTTTGTACCTATCTC
Re-OsFTL10-EcoRI	AAAGAATTCTTAAGGGCCTTCAGGCGCAAAC
Fw-pOsFTL10-EcoRI	AAGAATTCATCCGAGAACCAAACCTGGC
Re-pOsFTL10-BamHI	AAGGATCCTGATCTGTAGGGCTAGCTAGCG
Fw-OsFTL10-RNAi	CCCAAGCTTAAGCCACAGGTT
Re-OsFTL10-RNAi	CCCGAGCTCAGTTGAAGTTATGT
Primers for qRT-PCR
q-Fw-MADS14	CGGTTGCGAGACGAGGAA
q-Re-MADS14	GAAAGACGGTGCTGGACGAA
q-Fw-MADS15	CGTCGTCGGCCAAACAG
q-Re-MADS15	TGACTTCAATTCATTCAAGGTTGCT
q-Fw-UBQ	AACCAGCTGAGGCCCAAGA
q-Re-UBQ	ACGATTGATTTAACCAGTCCATGA
q-Fw-OsMADS51	GAAATCAAAGAAGATGTTGGCAAA
q-Re-OsMADS51	CTTCCTCCTGCCCCCTAGAG
q-Fw-Ehd1	GCGCTTTTGATTTCCTGC
q-Re-Ehd1	ATATGTGCTGCCAAATGTTGCT
q-Fw-OsGI	ATCGTTCTGCAGGCCGAGA
q-Re-OsGI	TCACCAATGCTTCTGGGCTAT
q-Fw-Hd1	TCAGCAACAGCATATCTTTCTCATCA
q-Re-Hd1	TCTGGAATTTGGCATATCTATCACC
q-Fw-OsFTL1	TCGGAACGATTTGAAATGGTAA
q-Re-OsFTL1	ATCGGTGGGAGCATTTATGTAACTA
q-Fw-Hd3a	GCTCACTATCATCATCCAGCATG
q-Re-Hd3a	CCTTGCTCAGCTATTTAATTGCATAA
q-Fw-RFT1	TGACCTAGATTCAAAGTCTAATCCTT
q-Re-RFT1	TGCCGGCCATGTCAAATTAATAAC
q-Fw-DREB2A	ATGCTGTTTCGATTTGTGTCTTGC
q-Re-DREB2A	CTGGTTTTGCTCCTTCCACCAC
OsbZIP23-RT-F	GGAGCAGCAAAAGAATGAGG
OsbZIP23-RT-R	GGTCTTCAGCTTCACCATCC
SNAC1-RT-F	GCGAGGGGTCAAGACTGATT
SNAC1-RT-R	TGCTGCATCTTCTCCCACTC
